# Supplementary material for: Two-dimensional azulenoid kekulene-based metallic allotropes for energy storage applications
Source: Royal Society of Chemistry journal article supplement (doi:10.1039/d4ta02934h), 2024-01-01
Supplement: d4ta02934h1.pdf [file d4ta02934h1.pdf]

## Supporting Information

### Two-dimensional azulenoid kekulenes based metallic allotropes for energy storage applications

Umer Younis<sup>a\*</sup>, Fizzah Qayyum<sup>c</sup>, Waqas Ahmad<sup>a</sup>, Arzoo Hassan<sup>d</sup>, Nisha Singh<sup>a</sup>, Muhammad Yaseen<sup>c</sup>, Yanning Zhang<sup>a\*</sup> and Zhiming Wang<sup>a,b\*</sup>

<sup>a</sup> Institute of Fundamental and Frontier Sciences, University of Electronic Science and Technology of China, Chengdu 610054, China.

<sup>b</sup> Institute for Advanced Study, Chengdu University, Chengdu 610106, P.R. China

<sup>c</sup> National Centre for Nanoscience and Technology (NCNST) Beiyitiao Zhongguancun, Beijing 100190, China.

<sup>d</sup> College of Physics and Optoelectronic Engineering, Shenzhen University, Shenzhen 518060, China.

<sup>e</sup> Department of Physics University of Agriculture Faisalabad 38000 Pakistan.

\*[umer.younas@pku.edu.cn](mailto:umer.younas@pku.edu.cn)

\*[yanningz@uestc.edu.cn](mailto:yanningz@uestc.edu.cn)

\*[zhmwang@uestc.edu.cn](mailto:zhmwang@uestc.edu.cn)

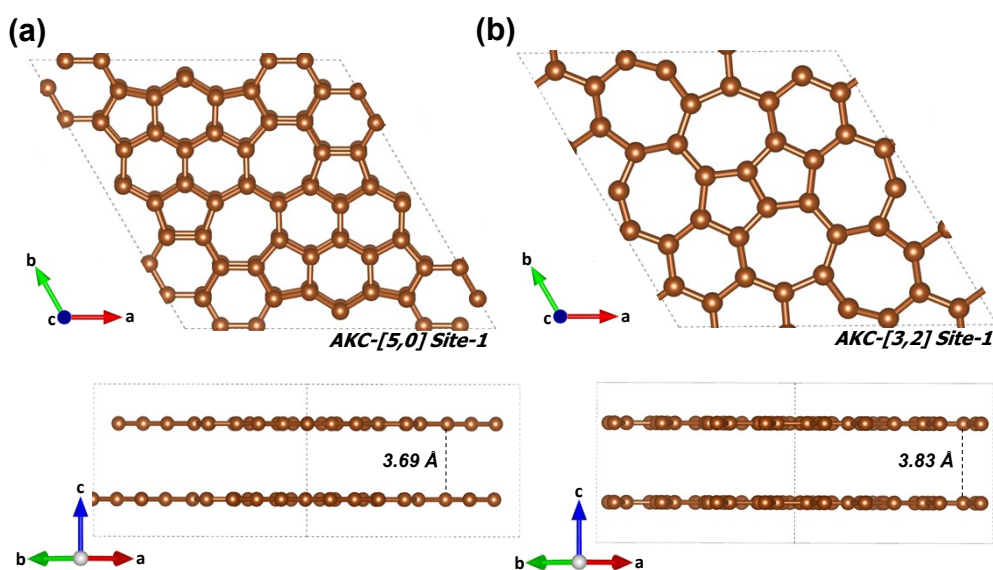

**Figure. S1** Top and side view of fully relaxed geometry of AA-stacking for metallic (a) AKC-5,0 and (b) AKC-3,2 carbon allotropes.

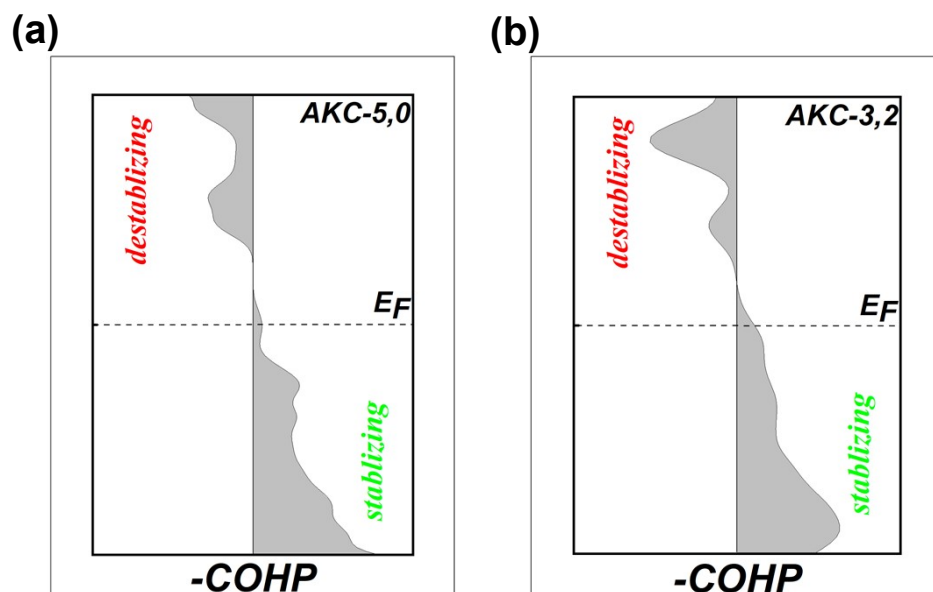

**Figure. S2** The crystal orbital Hamilton population (COHP) analysis for metallic (a) AKC-5,0 and (b) AKC-3,2 carbon allotropes.

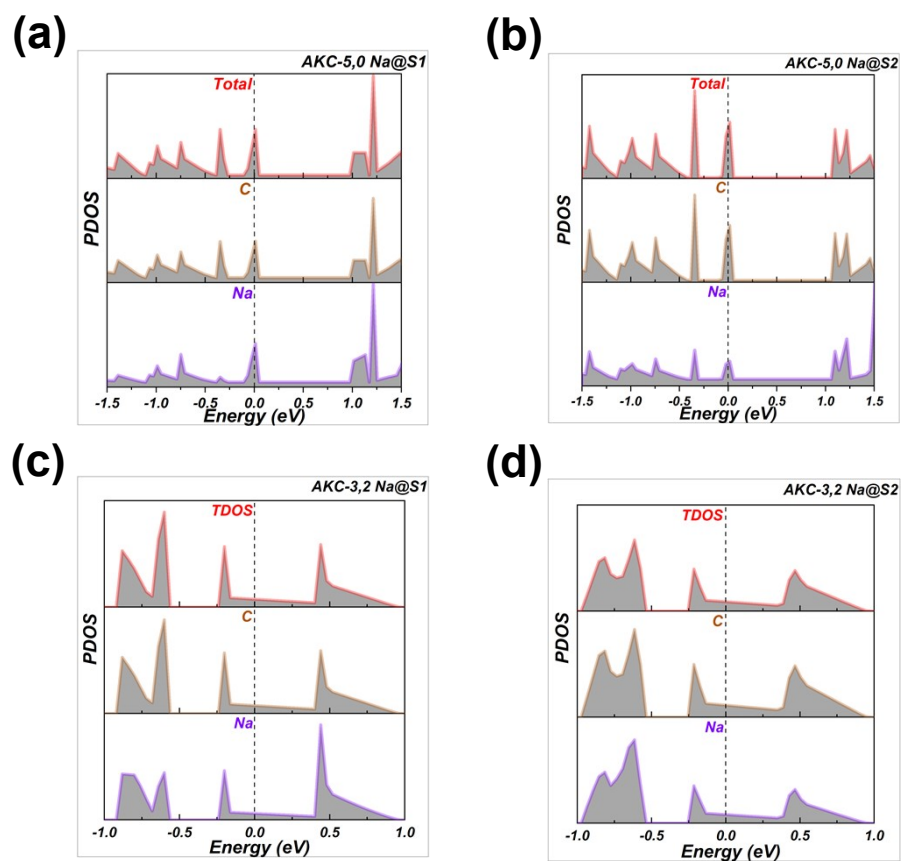

**Figure. S3** The partial density of states at the first two adsorption sites for metallic (a-b) AKC-5,0 and (c-d) AKC-3,2 carbon allotropes.

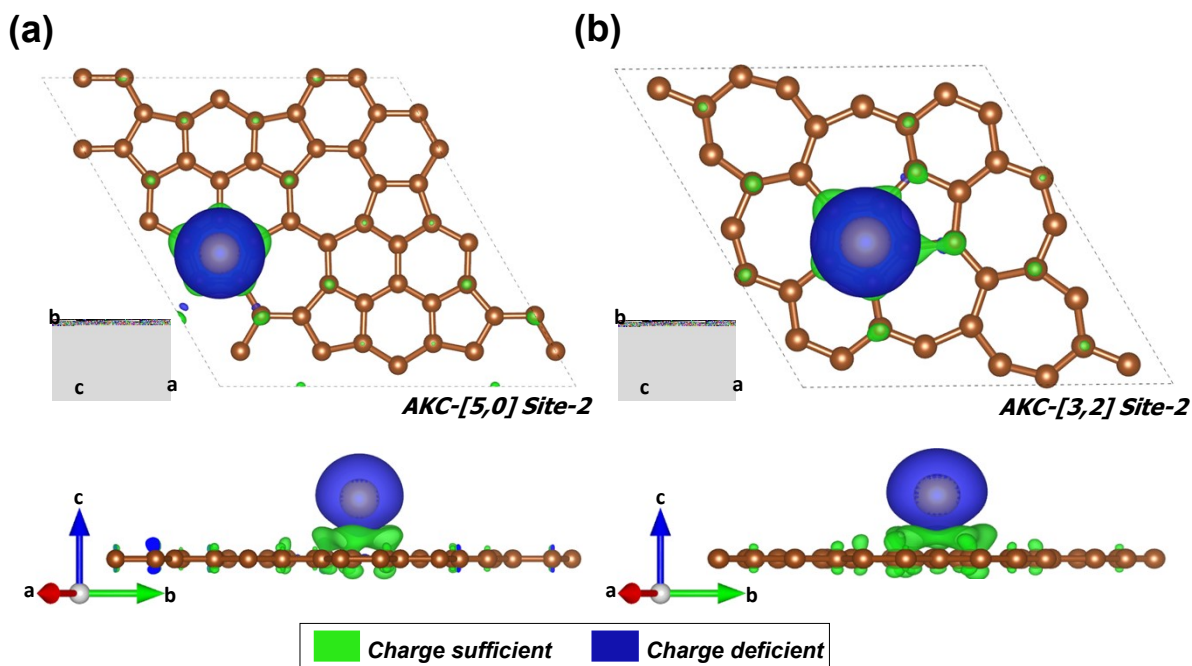

**Figure. S4** Results for charge density difference at the second most stable adsorption site of metallic (a) AKC-5,0 and (b) AKC-3,2 allotropes for sodium ion. The green and blue boxes represent the charge sufficient and charge deficient.

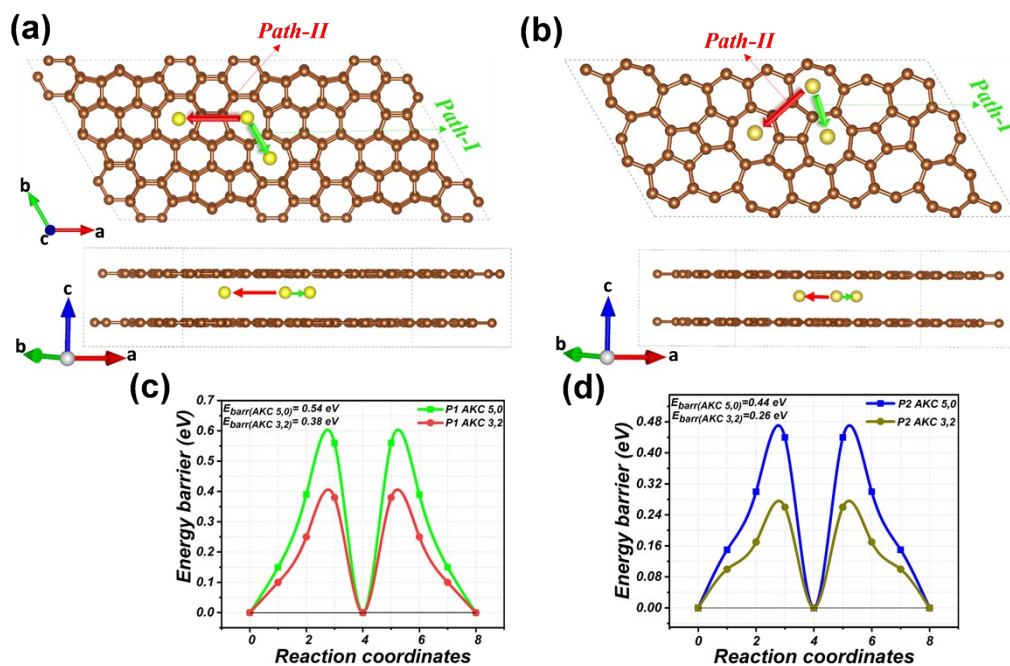

**Figure. S5** The two different diffusion pathways for sodium ions over (a-b) bilayer AKC-5,0 and bilayer AKC-3,2 allotropes and (c-d) their respective diffusion profiles.

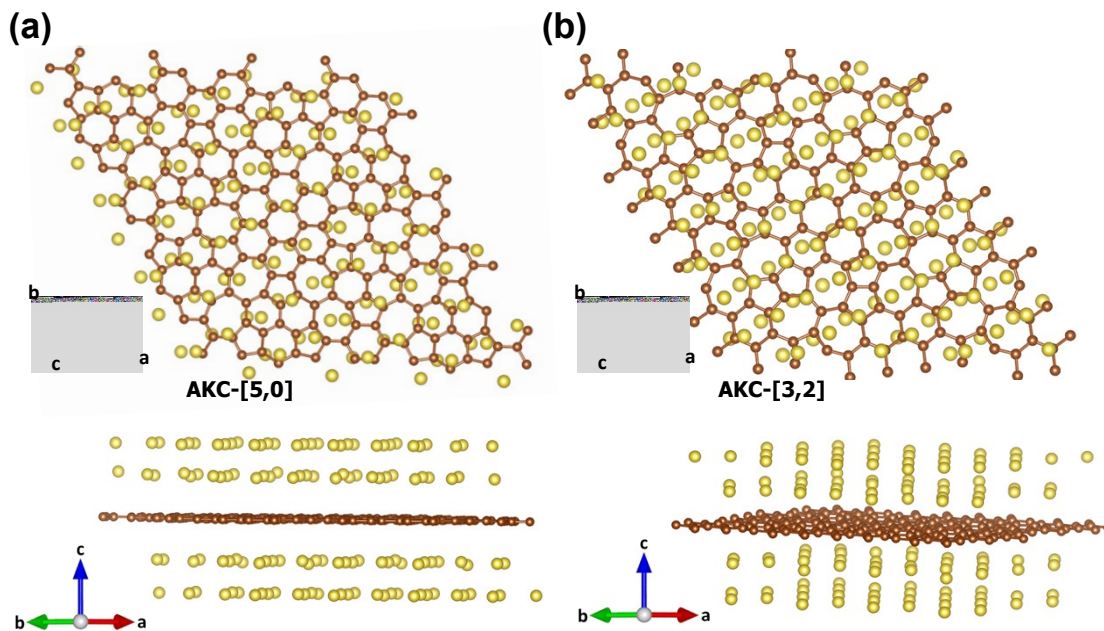

**Figure. S6** Top and side view of fully sodiated metallic (a) AKC-5,0 and (b) AKC-3,2 carbon allotropes

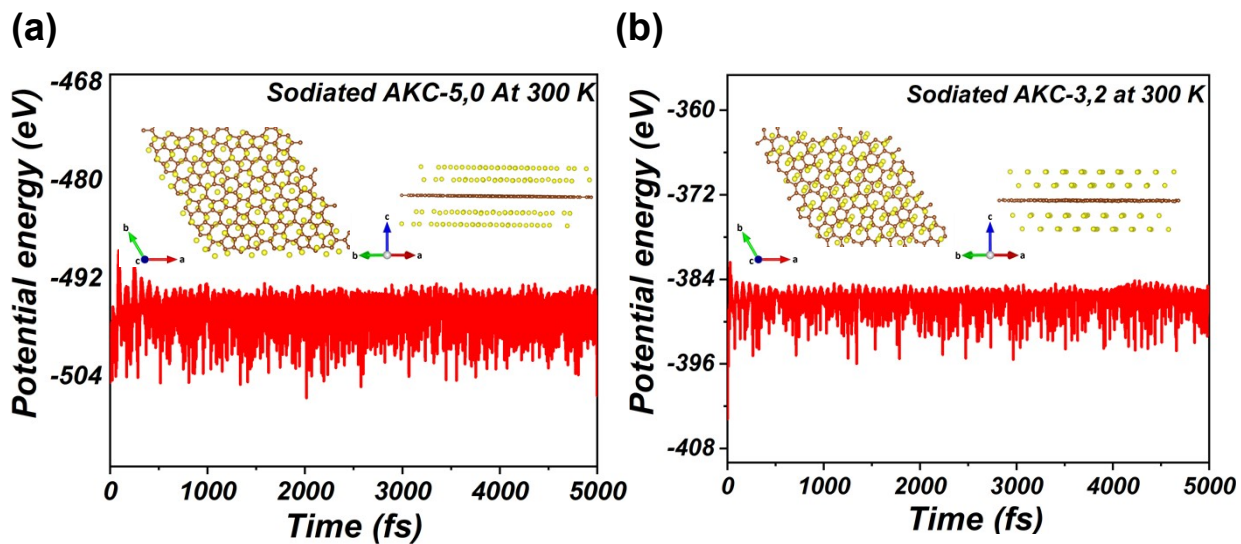

**Figure. S7** The fluctuation in potential energy for the fully sodiated metallic (a) AKC-5,0 and (b) AKC-3,2 allotropes with structural distortion calculated at 300 K.

**Table. S1** The vibration frequency, zero point energy and energy contribution of Na-ion at T.S for monolayer AKC-5,0 and AKC-3,2 allotropes.

|                                   | <i>AKC-3,2</i>     |                   | <i>AKC-5,0</i>    |                   |
|-----------------------------------|--------------------|-------------------|-------------------|-------------------|
|                                   | <i>Path-1</i>      | <i>Path-2</i>     | <i>Path-1</i>     | <i>Path-2</i>     |
| <i>Frequency</i>                  | <i>117.34 cm-1</i> | <i>78.98 cm-1</i> | <i>40.86 cm-1</i> | <i>53.76 cm-1</i> |
| <i>Zero point energy</i>          | <i>0.0186 eV</i>   | <i>0.0140 eV</i>  | <i>0.0152 eV</i>  | <i>0.0161 eV</i>  |
| <i>Energy contribution at T.S</i> | <i>0.077 eV</i>    | <i>0.024 eV</i>   | <i>0.0896 eV</i>  | <i>0.0882 eV</i>  |
